# Supplementary material
Source: publisher figshare collection journal article supplement (https://tandf.figshare.com/ndownloader/files/20153705)
Supplement: Supplementary file 1 [file 20153705]

**Table S1:** 1H-NMR and MS data of IM-1-2 and IM-1-4

| **Compound** | **Mass (70 ev) (*m/z*)** | **1H-NMR, 400 MHz, CDCl3, δ ppm** |
| --- | --- | --- |
| **IM-1-2**  **(C10H13N4OCl)** | 239 ((M+H)+-2), 198 ((M+H)+ -CONH), 156 (198-CCH3NH), 141 (155-CH3), 126 (141-NH) | 1.2 (d), 1.8 (d) (NH2, 2H), 2.1 (s, H3C-N, 3H), 2.9 (s, H3C-C=, 3H), 4.5 (s, H2C, 2H), 7.2 (d), 7.8 (d), 8.2 (s) (ring CH, 3H). |
| **IM-I-4 (C7H9N2Cl)** | 156 (M+H+), 155 (M+H+-H), 126 (155-CH3NH), 114 (155-CH3-NC). | 1.2(NH,1H), 2.4 (s, H3C, 3H), 3.7 (s, H2C, 2H), 7.2 (d), 7.8 (d), 8.2 (s) (ring CH, 3H). |
